# Supplementary material
Source: PubMed Central journal article supplement (PMC7265224)
Supplement: 12916_2020_1592_MOESM3_ESM.pdf [file 12916_2020_1592_MOESM3_ESM.pdf]

### **Additional File 3. Sensitivity analysis**

In some studies, estimated gestational age (EGA) in weeks (without days) was available at malaria episodes but not at delivery. When the EGA at delivery was calculated from the EGA at malaria episode, the difference of a maximum of seven days (i.e. day 0 or day 6 of the same week) can affect the binary category of PTB and SGA. For those studies, results assuming day 0 of the week were presented as the primary analyses, and those assuming day 6 of the week were presented as sensitivity analyses.

For PTB, the overall pooled proportion of extremely PTB (<28.0 weeks), very PTB ( $\geq 28$  to <32.0 weeks) and moderate to late PTB ( $\geq 32.0$  to <37.0 weeks) was 0.0% (5/2610, 95% CI 0.0 to 0.0,  $I^2$  0%), 0.1% (34/3279, 95% CI 0.0 to 0.4,  $I^2$  0%) and 7.8% (438/4147, 95% CI 5.6 to 10.3,  $I^2$  81%), respectively. The results of the univariable and multivariable analyses were similar to the primary analysis results (Additional Table 3-1), except that malaria transmission intensity was not associated with the risk of PTB.

For SGA, the overall pooled proportion of SGA was 38.1% (1310/3674, 95% CI 32.7 to 43.6,  $I^2$  88%). The results of the univariable and multivariable analyses were similar to the primary analysis results (Additional Table 3-2).

Additional Table 3-1. Univariable and multivariable logistic regression on the risk of moderate-to-late preterm birth assuming day 6 on the week

| Baseline characteristic              | Proportion (%)    | Univariable       |         | Multivariable (Complete case) |         | Multivariable (MI) |         |
|--------------------------------------|-------------------|-------------------|---------|-------------------------------|---------|--------------------|---------|
|                                      |                   | OR (95% CI)       | p-value | aOR (95% CI)                  | p-value | aOR (95% CI)       | p-value |
| <b>Treatment</b>                     |                   |                   |         |                               |         |                    |         |
| AL                                   | 114/1043 (11%)    | Reference         |         | Reference                     |         | Reference          |         |
| AAP                                  | 4/76 (5%)         | 0.62 (0.19–2.01)  | 0.42    | 1.77 (0.33–9.45)              | 0.51    | 0.55 (0.16–1.89)   | 0.34    |
| AS                                   | 15/174 (9%)       | 1.57 (0.72–3.40)  | 0.26    | 1.58 (0.61–4.12)              | 0.35    | 1.27 (0.55–2.91)   | 0.57    |
| ASAQ                                 | 82/750 (11%)      | 0.95 (0.69–1.31)  | 0.77    | 1.03 (0.71–1.49)              | 0.87    | 0.97 (0.70–1.34)   | 0.84    |
| ASMQ                                 | 81/927 (9%)       | 0.95 (0.69–1.32)  | 0.77    | 0.78 (0.52–1.16)              | 0.21    | 0.91 (0.65–1.28)   | 0.59    |
| ASSP                                 | 21/148 (14%)      | 1.81 (0.88–3.71)  | 0.11    | 0.89 (0.36–2.20)              | 0.80    | 1.67 (0.78–3.58)   | 0.19    |
| DP                                   | 102/807 (13%)     | 1.19 (0.88–1.61)  | 0.26    | 1.20 (0.87–1.67)              | 0.27    | 1.14 (0.83–1.56)   | 0.42    |
| Q                                    | 15/171 (9%)       | 1.28 (0.63–2.59)  | 0.50    | 2.40 (0.59–9.71)              | 0.22    | 1.53 (0.72–3.23)   | 0.27    |
| QC                                   | 4/51 (8%)         | 1.18 (0.32–4.44)  | 0.80    | No data                       |         | 1.18 (0.29–4.81)   | 0.82    |
| <b>EGA at malaria episode</b>        |                   |                   |         |                               |         |                    |         |
| 4.0–13.9                             | 5/38 (13%)        | 4.34 (1.56–12.06) | 0.005   | 2.71 (0.74–9.91)              | 0.13    | 4.02 (1.41–11.43)  | 0.009   |
| 14.0–19.9                            | 53/866 (6%)       | Reference         |         | Reference                     |         | Reference          |         |
| 20.0–23.9                            | 101/1029 (10%)    | 1.86 (1.31–2.64)  | 0.001   | 1.78 (1.20–2.65)              | 0.004   | 1.85 (1.30–2.65)   | <0.001  |
| 24.0–27.9                            | 90/921 (10%)      | 1.98 (1.38–2.84)  | <0.001  | 2.31 (1.54–3.46)              | <0.001  | 2.17 (1.50–3.14)   | <0.001  |
| 28.0–36.9 (weeks)                    | 189/1293 (15%)    | 3.79 (2.71–5.31)  | <0.001  | 4.80 (3.26–7.06)              | <0.001  | 4.51 (3.19–6.38)   | <0.001  |
| <b>Age Group</b>                     |                   |                   |         |                               |         |                    |         |
| <20                                  | 210/1334 (16%)    | Reference         |         | Reference                     |         | Reference          |         |
| 20–25                                | 106/1333 (8%)     | 0.50 (0.39–0.65)  | <0.001  | 0.61 (0.43–0.86)              | 0.005   | 0.60 (0.44–0.82)   | 0.001   |
| 25–30                                | 68/804 (8%)       | 0.54 (0.40–0.73)  | <0.001  | 0.91 (0.56–1.48)              | 0.70    | 0.73 (0.48–1.13)   | 0.16    |
| 30–35                                | 28/401 (7%)       | 0.44 (0.29–0.67)  | <0.001  | 0.52 (0.27–0.98)              | 0.04    | 0.56 (0.33–0.97)   | 0.04    |
| ≥35 (years)                          | 26/275 (9%)       | 0.71 (0.46–1.11)  | 0.14    | 0.77 (0.37–1.58)              | 0.48    | 0.92 (0.52–1.63)   | 0.78    |
| <b>Pregnancy history</b>             |                   |                   |         |                               |         |                    |         |
| G 1                                  | 210/1449 (14%)    | Reference         |         | Reference                     |         | Reference          |         |
| G 2 with no loss                     | 58/706 (8%)       | 0.55 (0.41–0.75)  | <0.001  | 0.72 (0.48–1.07)              | 0.10    | 0.68 (0.48–0.98)   | 0.04    |
| G ≥3 with no loss                    | 91/1129 (8%)      | 0.54 (0.41–0.70)  | <0.001  | 0.60 (0.37–0.96)              | 0.03    | 0.66 (0.44–1.00)   | 0.048   |
| G 2 with 1 loss                      | 27/252 (11%)      | 0.81 (0.52–1.26)  | 0.35    | 1.12 (0.70–1.80)              | 0.64    | 0.92 (0.58–1.45)   | 0.72    |
| G ≥3 with 1 loss                     | 34/436 (8%)       | 0.56 (0.38–0.82)  | 0.003   | 0.64 (0.38–1.10)              | 0.11    | 0.66 (0.41–1.07)   | 0.09    |
| G ≥3 with ≥2 losses                  | 15/138 (11%)      | 1.01 (0.57–1.79)  | 0.97    | 1.38 (0.67–2.84)              | 0.38    | 1.16 (0.61–2.21)   | 0.64    |
| Weight (kg)                          | 437/4146 (11%)    | 0.98 (0.97–1.00)  | 0.009   |                               |         |                    |         |
| Height (cm)                          | 399/3670 (11%)    | 0.98 (0.97–1.00)  | 0.05    | 0.98 (0.96–1.00)              | 0.08    | 0.98 (0.96–1.00)   | 0.05    |
| BMI (kg/m <sup>2</sup> )             | 399/3670 (11%)    | 0.96 (0.92–1.00)  | 0.047   | 0.95 (0.91–1.00)              | 0.04    | 0.94 (0.9–0.99)    | 0.009   |
| HIV infection                        | Yes 4/31 (13%)    | 1.97 (0.65–5.98)  | 0.23    | 2.95 (0.54–16.03)             | 0.21    | 1.43 (0.43–4.8)    | 0.55    |
|                                      | No 376/3476 (11%) | Reference         |         | Reference                     |         | Reference          |         |
| Parasitaemia (log <sub>10</sub> /μL) | 438/4147 (11%)    | 1.08 (0.95–1.22)  | 0.23    |                               |         |                    |         |
| Fever >37.5°C                        | Yes 35/375 (9%)   | 1.08 (0.74–1.57)  | 0.70    |                               |         |                    |         |
|                                      | No 393/3734 (11%) | Reference         |         |                               |         |                    |         |
| Haemoglobin (g/dL)                   | 435/4123 (11%)    | 0.93 (0.86–1.00)  | 0.05    |                               |         |                    |         |
| Gametocytaemia                       | Yes 21/154 (14%)  | 1.68 (1.03–2.72)  | 0.04    |                               |         |                    |         |
|                                      | No 407/3936 (10%) | Reference         |         |                               |         |                    |         |
| Mixed Infection                      | Yes 2/29 (7%)     | 1.09 (0.25–4.71)  | 0.91    |                               |         |                    |         |
|                                      | No 436/4118 (11%) | Reference         |         |                               |         |                    |         |
| <b>Malaria transmission</b>          |                   |                   |         |                               |         |                    |         |
| Low                                  | 72/929 (8%)       | 0.81 (0.47–1.41)  | 0.46    |                               |         |                    |         |
| Moderate                             | 265/2247 (12%)    | Reference         |         |                               |         |                    |         |
| High                                 | 101/971 (10%)     | 0.92 (0.49–1.71)  | 0.79    |                               |         |                    |         |

Intraclass correlation: 0.09. AAP: artesunate with atovaquone-proguanil, AL: artemether-lumefantrine, aOR: adjusted odds ratio, AS: artesunate monotherapy, ASAQ: artesunate-amodiaquine, ASMQ: artesunate-mefloquine, ASSP: artesunate-sulfadoxine-pyrimethamine, BMI: body mass index, CI: confidence interval, DP: dihydroartemisinin-piperaquine, EGA: estimated gestational age, G: gravidity, HIV: human immunodeficiency virus, OR: odds ratio, Q: quinine monotherapy, QC: quinine with clindamycin.

Additional Table 3-2. Univariable and multivariable logistic regression on the risk of small-for-gestational-age assuming day 6 on the week

| Baseline characteristic              | Proportion (%)     | Univariable      |         | Multivariable (Complete case) |         | Multivariable (MI) |         |
|--------------------------------------|--------------------|------------------|---------|-------------------------------|---------|--------------------|---------|
|                                      |                    | OR (95% CI)      | p-value | aOR (95% CI)                  | p-value | aOR (95% CI)       | p-value |
| <b>Treatment</b>                     |                    |                  |         |                               |         |                    |         |
| AL                                   | 307/969 (32%)      | Reference        |         | Reference                     |         | Reference          |         |
| AAP                                  | 25/55 (45%)        | 1.61 (0.78–3.29) | 0.20    | 0.52 (0.14–1.92)              | 0.33    | 1.43 (0.60–3.39)   | 0.42    |
| AS                                   | 56/154 (36%)       | 1.22 (0.75–1.98) | 0.42    | 1.20 (0.68–2.14)              | 0.53    | 1.16 (0.68–1.98)   | 0.58    |
| ASAQ                                 | 253/695 (36%)      | 1.24 (0.99–1.56) | 0.06    | 1.13 (0.86–1.49)              | 0.39    | 1.28 (1.01–1.62)   | 0.045   |
| ASMQ                                 | 337/810 (42%)      | 1.11 (0.89–1.39) | 0.35    | 1.09 (0.84–1.42)              | 0.51    | 1.10 (0.87–1.38)   | 0.44    |
| ASSP                                 | 67/128 (52%)       | 1.51 (0.92–2.49) | 0.10    | 1.77 (0.98–3.22)              | 0.06    | 1.39 (0.81–2.39)   | 0.23    |
| DP                                   | 230/703 (33%)      | 0.98 (0.77–1.23) | 0.84    | 0.98 (0.76–1.27)              | 0.87    | 0.97 (0.76–1.24)   | 0.83    |
| Q                                    | 20/119 (17%)       | 0.50 (0.27–0.89) | 0.02    | 0.16 (0.04–0.65)              | 0.01    | 0.56 (0.28–1.12)   | 0.10    |
| QC                                   | 15/41 (37%)        | 1.09 (0.46–2.58) | 0.84    | No data                       |         | 0.89 (0.33–2.46)   | 0.83    |
| <b>EGA at malaria episode</b>        |                    |                  |         |                               |         |                    |         |
| 4.0–13.9                             | 10/31 (32%)        | 0.66 (0.29–1.49) | 0.32    | 0.65 (0.26–1.60)              | 0.35    | 0.59 (0.25–1.36)   | 0.21    |
| 14.0–19.9                            | 288/758 (38%)      | Reference        |         | Reference                     |         | Reference          |         |
| 20.0–23.9                            | 334/911 (37%)      | 0.84 (0.68–1.03) | 0.10    | 0.84 (0.66–1.07)              | 0.16    | 0.84 (0.68–1.04)   | 0.11    |
| 24.0–27.9                            | 295/816 (36%)      | 0.75 (0.61–0.94) | 0.01    | 0.80 (0.62–1.04)              | 0.09    | 0.81 (0.65–1.02)   | 0.07    |
| 28.0–36.9                            | 367/1119 (33%)     | 0.58 (0.47–0.72) | <0.001  | 0.64 (0.50–0.82)              | <0.001  | 0.67 (0.54–0.83)   | <0.001  |
| ≥37.0 (weeks)                        | 16/39 (41%)        | 1.03 (0.51–2.05) | 0.94    | 0.47 (0.12–1.81)              | 0.27    | 1.28 (0.62–2.64)   | 0.51    |
| <b>Age Group</b>                     |                    |                  |         |                               |         |                    |         |
| <20                                  | 494/1199 (41%)     | Reference        |         |                               |         |                    |         |
| 20–25                                | 431/1175 (37%)     | 0.69 (0.58–0.83) | <0.001  |                               |         |                    |         |
| 25–30                                | 210/710 (30%)      | 0.50 (0.40–0.61) | <0.001  |                               |         |                    |         |
| 30–35                                | 96/348 (28%)       | 0.45 (0.34–0.59) | <0.001  |                               |         |                    |         |
| ≥35 (years)                          | 79/242 (33%)       | 0.56 (0.41–0.76) | <0.001  |                               |         |                    |         |
| <b>Pregnancy history</b>             |                    |                  |         |                               |         |                    |         |
| G 1                                  | 577/1312 (44%)     | Reference        |         | Reference                     |         | Reference          |         |
| G 2 with no loss                     | 192/606 (32%)      | 0.54 (0.44–0.66) | <0.001  | 0.59 (0.46–0.75)              | <0.001  | 0.57 (0.46–0.70)   | <0.001  |
| G≥3 with no loss                     | 257/998 (26%)      | 0.40 (0.33–0.48) | <0.001  | 0.47 (0.37–0.59)              | <0.001  | 0.47 (0.38–0.57)   | <0.001  |
| G 2 with 1 loss                      | 99/225 (44%)       | 0.80 (0.59–1.07) | 0.13    | 0.72 (0.51–1.01)              | 0.06    | 0.79 (0.59–1.08)   | 0.14    |
| G≥3 with 1 loss                      | 116/379 (31%)      | 0.46 (0.36–0.59) | <0.001  | 0.52 (0.39–0.71)              | <0.001  | 0.54 (0.41–0.70)   | <0.001  |
| G≥3 with ≥2 losses                   | 50/117 (43%)       | 0.77 (0.52–1.14) | 0.19    | 0.77 (0.47–1.25)              | 0.29    | 0.81 (0.54–1.22)   | 0.31    |
| Weight (kg)                          | 1310/3674 (36%)    | 0.95 (0.94–0.96) | <0.001  |                               |         |                    |         |
| Height (cm)                          | 1193/3315 (36%)    | 0.96 (0.94–0.97) | <0.001  | 0.95 (0.94–0.97)              | <0.001  | 0.95 (0.94–0.96)   | <0.001  |
| BMI (kg/m <sup>2</sup> )             | 1193/3315 (36%)    | 0.92 (0.90–0.95) | <0.001  | 0.92 (0.89–0.95)              | <0.001  | 0.92 (0.90–0.95)   | <0.001  |
| HIV infection                        | Yes 7/24 (29%)     | 0.82 (0.32–2.08) | 0.68    | 2.26 (0.55–9.23)              | 0.26    | 1.11 (0.47–2.62)   | 0.82    |
|                                      | No 225/568 (40%)   | Reference        |         | Reference                     |         | Reference          |         |
| Parasitaemia (log <sub>10</sub> /μL) | 1310/3674 (36%)    | 1.24 (1.13–1.35) | <0.001  | 1.16 (1.04–1.30)              | 0.007   | 1.13 (1.03–1.24)   | 0.01    |
| Fever >37.5°C                        | Yes 124/324 (38%)  | 1.03 (0.81–1.33) | 0.80    |                               |         |                    |         |
|                                      | No 1178/3322 (35%) | Reference        |         |                               |         |                    |         |
| Haemoglobin (g/dL)                   | 1306/3657 (36%)    | 0.88 (0.83–0.92) | <0.001  |                               |         |                    |         |
| Gametocytæmia                        | Yes 45/133 (34%)   | 0.91 (0.62–1.32) | 0.61    |                               |         |                    |         |
|                                      | No 1246/3490 (36%) | Reference        |         |                               |         |                    |         |
| Mixed Infection                      | Yes 14/25 (56%)    | 2.98 (1.30–6.80) | 0.01    | 1.43 (0.49–4.20)              | 0.51    | 2.47 (1.05–5.82)   | 0.04    |
|                                      | No 1296/3649 (36%) | Reference        |         | Reference                     |         | Reference          |         |
| <b>Malaria transmission</b>          |                    |                  |         |                               |         |                    |         |
| Low                                  | 277/726 (38%)      | 0.90 (0.59–1.37) | 0.61    |                               |         |                    |         |
| Moderate                             | 680/2018 (34%)     | Reference        |         |                               |         |                    |         |
| High                                 | 353/930 (38%)      | 0.82 (0.54–1.25) | 0.36    |                               |         |                    |         |

Intraclass correlation: 0.06. AAP: artesunate with atovaquone-proguanil, AL: artemether-lumefantrine, aOR: adjusted odds ratio, AS: artesunate monotherapy, ASAQ: artesunate-amodiaquine, ASMQ: artesunate-mefloquine, ASSP: artesunate-sulfadoxine-pyrimethamine, BMI: body mass index, CI: confidence interval, DP: dihydroartemisinin-piperazine, EGA: estimated gestational age, G: gravidity, HIV: human immunodeficiency virus, OR: odds ratio, Q: quinine monotherapy, QC: quinine with clindamycin.

One reviewer requested to run analyses stratified by geographical region. We have conducted requested analyses for moderate-to-late PTB, SGA and placental malaria, which have enough number of events. In Asia, there are only one or two study sites included, so interpretation needs caution. Same imputed dataset was used for each outcome (except placental malaria which multiple imputation was not needed).

Additional Table 3-3. Multivariable logistic regression on the risk of moderate-to-late preterm birth stratified by geographical region using multiple imputation

| Baseline characteristic              | Proportion (%)    | Multivariable (All) |         | Multivariable (Africa) |         | Multivariable (Asia) |         |
|--------------------------------------|-------------------|---------------------|---------|------------------------|---------|----------------------|---------|
|                                      |                   | aOR (95% CI)        | p-value | aOR (95% CI)           | p-value | aOR (95% CI)         | p-value |
| <b>Treatment</b>                     |                   |                     |         |                        |         |                      |         |
| AL                                   | 156/1035 (15%)    | Reference           |         | Reference              |         | Reference            |         |
| AAP                                  | 4/76 (5%)         | 0.69 (0.19–2.44)    | 0.56    | No data                |         | 1.88 (0.40-8.82)     | 0.43    |
| AS                                   | 15/174 (9%)       | 1.49 (0.64–3.50)    | 0.36    | No data                |         | 3.00 (0.83-10.82)    | 0.09    |
| ASAQ                                 | 124/747 (17%)     | 1.05 (0.79–1.39)    | 0.75    | 1.03 (0.78-1.38)       | 0.82    | No data              |         |
| ASMQ                                 | 128/926 (14%)     | 1.07 (0.80–1.41)    | 0.65    | 1.01 (0.75-1.35)       | 0.97    | 4.60 (1.26-16.77)    | 0.02    |
| ASSP                                 | 22/147 (15%)      | 1.83 (0.88–3.81)    | 0.10    | 4.90 (1.23-19.48)      | 0.02    | 4.02 (1.05-15.38)    | 0.04    |
| DP                                   | 151/804 (19%)     | 1.22 (0.93–1.60)    | 0.15    | 1.23 (0.93-1.62)       | 0.15    | 1.23 (0.19-7.88)     | 0.83    |
| Q                                    | 15/171 (9%)       | 1.67 (0.79–3.54)    | 0.18    | 1.74 (0.56-5.44)       | 0.34    | 5.85 (1.46-23.53)    | 0.01    |
| QC                                   | 4/51 (8%)         | 1.39 (0.34–5.67)    | 0.65    | No data                |         | 2.97 (0.62-14.21)    | 0.17    |
| <b>EGA at malaria episode</b>        |                   |                     |         |                        |         |                      |         |
| 4.0–13.9                             | 5/38 (13%)        | 3.92 (1.38–11.13)   | 0.01    | 3.75 (0.34-40.99)      | 0.28    | 2.89 (0.81-10.30)    | 0.10    |
| 14.0–19.9                            | 78/863 (9%)       | Reference           |         | Reference              |         | Reference            |         |
| 20.0–23.9                            | 136/1023 (13%)    | 1.71 (1.25–2.32)    | <0.001  | 1.84 (1.33-2.56)       | <0.001  | 1.04 (0.42-2.57)     | 0.94    |
| 24.0–27.9                            | 142/917 (15%)     | 2.37 (1.74–3.23)    | <0.001  | 2.53 (1.81-3.53)       | <0.001  | 1.78 (0.75-4.24)     | 0.19    |
| 28.0–36.9 (weeks)                    | 258/1290 (20%)    | 4.33 (3.21–5.84)    | <0.001  | 5.00 (3.61-6.92)       | <0.001  | 1.86 (0.86-4.04)     | 0.11    |
| <b>Age Group</b>                     |                   |                     |         |                        |         |                      |         |
| <20                                  | 284/1323 (21%)    | Reference           |         | Reference              |         | Reference            |         |
| 20–25                                | 154/1330 (12%)    | 0.67 (0.51–0.87)    | 0.003   | 0.68 (0.51-0.91)       | 0.01    | 0.57 (0.26-1.23)     | 0.15    |
| 25–30                                | 100/803 (12%)     | 0.82 (0.56–1.18)    | 0.29    | 0.93 (0.62-1.40)       | 0.73    | 0.50 (0.19-1.33)     | 0.16    |
| 30–35                                | 46/401 (11%)      | 0.72 (0.45–1.12)    | 0.15    | 0.79 (0.48-1.31)       | 0.37    | 0.45 (0.15-1.38)     | 0.16    |
| ≥35 (years)                          | 35/274 (13%)      | 0.99 (0.60–1.64)    | 0.98    | 1.28 (0.74-2.24)       | 0.38    | 0.40 (0.12-1.37)     | 0.14    |
| <b>Pregnancy history</b>             |                   |                     |         |                        |         |                      |         |
| G 1                                  | 284/1439 (20%)    | Reference           |         | Reference              |         | Reference            |         |
| G 2 with no loss                     | 81/704 (12%)      | 0.65 (0.48–0.89)    | 0.007   | 0.64 (0.46-0.90)       | 0.01    | 0.63 (0.26-1.51)     | 0.30    |
| G≥3 with no loss                     | 141/1128 (12%)    | 0.67 (0.47–0.96)    | 0.03    | 0.57 (0.39-0.85)       | 0.01    | 1.48 (0.63-3.50)     | 0.37    |
| G 2 with 1 loss                      | 41/251 (16%)      | 0.95 (0.65–1.40)    | 0.81    | 0.96 (0.64-1.45)       | 0.86    | 0.90 (0.25-3.27)     | 0.87    |
| G≥3 with 1 loss                      | 51/435 (12%)      | 0.66 (0.44–0.99)    | 0.046   | 0.62 (0.40-0.97)       | 0.03    | 0.74 (0.24-2.25)     | 0.59    |
| G≥3 with ≥2 losses                   | 18/137 (13%)      | 1.00 (0.56–1.79)    | 1.00    | 0.62 (0.29-1.36)       | 0.24    | 2.79 (1.04-7.47)     | 0.04    |
| Weight (kg)                          | 618/4130 (15%)    |                     |         |                        |         |                      |         |
| Height (cm)                          | 579/3655 (16%)    | 0.98 (0.96–0.99)    | 0.01    | 0.98 (0.96-1.00)       | 0.02    | 0.98 (0.93-1.04)     | 0.52    |
| BMI (kg/m <sup>2</sup> )             | 579/3655 (16%)    | 0.94 (0.90–0.97)    | <0.001  | 0.94 (0.90-0.98)       | 0.002   | 0.94 (0.84-1.06)     | 0.32    |
| HIV infection                        | Yes 4/31 (13%)    | 1.22 (0.36–4.09)    | 0.75    | 1.10 (0.37-3.24)       | 0.87    | No data              |         |
|                                      | No 527/3462 (15%) | Reference           |         | Reference              |         |                      |         |
| Parasitaemia (log <sub>10</sub> /μL) | 619/4131 (15%)    |                     |         |                        |         |                      |         |
| Fever >37.5°C                        | Yes 45/375 (12%)  |                     |         |                        |         |                      |         |
|                                      | No 563/3719 (15%) |                     |         |                        |         |                      |         |
| Haemoglobin (g/dL)                   | 616/4107 (15%)    |                     |         |                        |         |                      |         |
| Gametocyaemia                        | Yes 24/153 (16%)  |                     |         |                        |         |                      |         |
|                                      | No 584/3922 (15%) |                     |         |                        |         |                      |         |
| Mixed Infection                      | Yes 2/29 (7%)     |                     |         |                        |         |                      |         |
|                                      | No 617/4102 (15%) |                     |         |                        |         |                      |         |
| <b>Malaria transmission</b>          |                   |                     |         |                        |         |                      |         |
| Low                                  | 72/929 (8%)       | 0.42 (0.22–0.81)    | 0.009   | 0.84 (0.26-2.69)       | 0.77    |                      |         |
| Moderate                             | 397/2236 (18%)    | Reference           |         | Reference              |         | No data              |         |
| High                                 | 150/966 (16%)     | 0.86 (0.47–1.58)    | 0.63    | 0.69 (0.34-1.42)       | 0.31    | No data              |         |

AAP: artesunate with atovaquone-proguanil, AL: artemether-lumefantrine, aOR: adjusted odds ratio, AS: artesunate monotherapy, ASAQ: artesunate-amodiaquine, ASMQ: artesunate-mefloquine, ASSP: artesunate-sulfadoxine-pyrimethamine, BMI: body mass index, CI: confidence interval, DP: dihydroartemisinin-piperazine, EGA: estimated gestational age, G: gravidity, HIV: human immunodeficiency virus, MI: multiple imputation, OR: odds ratio, Q: quinine monotherapy, QC: quinine with clindamycin.

Additional Table 3-4. Multivariable logistic regression on the risk of small-for-gestational-age stratified by geographical region using multiple imputation

| Baseline characteristic              | Proportion (%)    | Multivariable (All) |         | Multivariable (Africa) |         | Multivariable (Asia) |         |
|--------------------------------------|-------------------|---------------------|---------|------------------------|---------|----------------------|---------|
|                                      |                   | aOR (95% CI)        | p-value | aOR (95% CI)           | p-value | aOR (95% CI)         | p-value |
| <b>Treatment</b>                     |                   |                     |         |                        |         |                      |         |
| AL                                   | 241/973 (25%)     | Reference           |         | Reference              |         | Reference            |         |
| AAP                                  | 25/55 (45%)       | 1.85 (0.72–4.75)    | 0.20    | No data                |         | 2.19 (1.05–4.53)     | 0.04    |
| AS                                   | 56/154 (36%)      | 1.26 (0.74–2.16)    | 0.40    | No data                |         | 1.41 (0.80–2.50)     | 0.24    |
| ASAQ                                 | 164/700 (23%)     | 1.05 (0.80–1.37)    | 0.73    | 1.04 (0.79–1.36)       | 0.79    | No data              |         |
| ASMQ                                 | 257/820 (31%)     | 1.00 (0.78–1.28)    | 0.99    | 1.01 (0.78–1.31)       | 0.92    | 2.00 (1.10–3.67)     | 0.02    |
| ASSP                                 | 66/129 (51%)      | 1.37 (0.79–2.36)    | 0.27    | 0.29 (0.07–1.19)       | 0.09    | 3.21 (1.71–6.02)     | <0.001  |
| DP                                   | 163/716 (23%)     | 0.87 (0.67–1.14)    | 0.31    | 0.86 (0.65–1.13)       | 0.27    | 1.99 (0.84–4.70)     | 0.12    |
| Q                                    | 20/119 (17%)      | 0.69 (0.32–1.52)    | 0.36    | 0.67 (0.27–1.68)       | 0.39    | 0.85 (0.35–2.07)     | 0.72    |
| QC                                   | 15/41 (37%)       | 1.11 (0.37–3.35)    | 0.86    | No data                |         | 1.37 (0.61–3.08)     | 0.44    |
| <b>EGA at malaria episode</b>        |                   |                     |         |                        |         |                      |         |
| 4.0–13.9                             | 10/31 (32%)       | 0.62 (0.27–1.45)    | 0.27    | 0.14 (0.01–2.70)       | 0.19    | 0.82 (0.32–2.09)     | 0.68    |
| 14.0–19.9                            | 227/765 (30%)     | Reference           |         | Reference              |         | Reference            |         |
| 20.0–23.9                            | 246/914 (27%)     | 0.80 (0.63–1.00)    | 0.05    | 0.77 (0.60–1.00)       | 0.05    | 0.85 (0.50–1.43)     | 0.54    |
| 24.0–27.9                            | 219/820 (27%)     | 0.80 (0.63–1.01)    | 0.07    | 0.77 (0.59–1.00)       | 0.05    | 0.88 (0.51–1.53)     | 0.65    |
| 28.0–36.9                            | 289/1138 (25%)    | 0.70 (0.55–0.87)    | 0.002   | 0.58 (0.45–0.76)       | <0.001  | 1.21 (0.76–1.95)     | 0.42    |
| ≥37.0 (weeks)                        | 16/39 (41%)       | 1.36 (0.66–2.84)    | 0.41    | 0.29 (0.05–1.83)       | 0.19    | 2.81 (1.13–6.99)     | 0.03    |
| <b>Age Group</b>                     |                   |                     |         |                        |         |                      |         |
| <20                                  | 379/1202 (32%)    |                     |         |                        |         |                      |         |
| 20–25                                | 332/1185 (28%)    |                     |         |                        |         |                      |         |
| 25–30                                | 170/717 (24%)     |                     |         |                        |         |                      |         |
| 30–35                                | 63/357 (18%)      |                     |         |                        |         |                      |         |
| ≥35 (years)                          | 63/246 (26%)      |                     |         |                        |         |                      |         |
| <b>Pregnancy history</b>             |                   |                     |         |                        |         |                      |         |
| G 1                                  | 444/1316 (34%)    | Reference           |         | Reference              |         | Reference            |         |
| G 2 with no loss                     | 154/614 (25%)     | 0.62 (0.49–0.78)    | <0.001  | 0.55 (0.42–0.72)       | <0.001  | 0.87 (0.54–1.39)     | 0.55    |
| G≥3 with no loss                     | 186/1011 (18%)    | 0.48 (0.39–0.60)    | <0.001  | 0.46 (0.36–0.58)       | <0.001  | 0.57 (0.36–0.90)     | 0.02    |
| G 2 with 1 loss                      | 76/225 (34%)      | 0.82 (0.59–1.12)    | 0.21    | 0.80 (0.56–1.13)       | 0.20    | 0.94 (0.40–2.21)     | 0.89    |
| G≥3 with 1 loss                      | 88/387 (23%)      | 0.54 (0.41–0.72)    | <0.001  | 0.52 (0.37–0.72)       | <0.001  | 0.67 (0.38–1.18)     | 0.16    |
| G≥3 with ≥2 losses                   | 40/117 (34%)      | 0.79 (0.51–1.21)    | 0.27    | 0.73 (0.42–1.29)       | 0.28    | 0.83 (0.41–1.67)     | 0.61    |
| Weight (kg)                          | 1007/3707 (27%)   |                     |         |                        |         |                      |         |
| Height (cm)                          | 891/3347 (27%)    | 0.95 (0.93–0.96)    | <0.001  | 0.94 (0.93–0.96)       | <0.001  | 0.96 (0.93–0.99)     | 0.01    |
| BMI (kg/m <sup>2</sup> )             | 891/3347 (27%)    | 0.92 (0.89–0.95)    | <0.001  | 0.92 (0.89–0.96)       | <0.001  | 0.92 (0.86–0.99)     | 0.03    |
| HIV infection                        | Yes 6/24 (25%)    | 1.04 (0.43–2.55)    | 0.92    | 1.22 (0.45–3.26)       | 0.69    | No data              |         |
|                                      | No 849/3105 (27%) | Reference           |         | Reference              |         |                      |         |
| Parasitaemia (log <sub>10</sub> /μL) | 1007/3707 (27%)   | 1.14 (1.03–1.26)    | 0.009   | 1.14 (1.01–1.29)       | 0.03    | 1.10 (0.93–1.31)     | 0.27    |
| Fever >37.5°C                        | Yes 112/325 (34%) |                     |         |                        |         |                      |         |
|                                      | No 888/3352 (26%) |                     |         |                        |         |                      |         |
| Haemoglobin (g/dL)                   | 1003/3690 (27%)   |                     |         |                        |         |                      |         |
| Gametocytaemia                       | Yes 36/133 (27%)  |                     |         |                        |         |                      |         |
|                                      | No 953/3522 (27%) |                     |         |                        |         |                      |         |
| Mixed Infection                      | Yes 14/25 (56%)   | 2.54 (1.07–5.99)    | 0.03    | 19.79 (1.55–252.07)    | 0.02    | 1.88 (0.73–4.86)     | 0.19    |
|                                      | No 993/3682 (27%) | Reference           |         |                        |         |                      |         |
| <b>Malaria transmission</b>          |                   |                     |         |                        |         |                      |         |
| Low                                  | 277/726 (38%)     |                     |         |                        |         |                      |         |
| Moderate                             | 484/2040 (24%)    |                     |         |                        |         |                      |         |
| High                                 | 246/941 (26%)     |                     |         |                        |         |                      |         |

AAP: artesunate with atovaquone-proguanil, AL: artemether-lumefantrine, aOR: adjusted odds ratio, AS: artesunate monotherapy, ASAQ: artesunate-amodiaquine, ASMQ: artesunate-mefloquine, ASSP: artesunate-sulfadoxine-pyrimethamine, BMI: body mass index, CI: confidence interval, DP: dihydroartemisinin-piperazine, EGA: estimated gestational age, G: gravidity, HIV: human immunodeficiency virus, MI: multiple imputation, OR: odds ratio, Q: quinine monotherapy, QC: quinine with clindamycin.

Additional Table 3-5. Multivariable logistic regression on the risk of malaria pigment deposition stratified by geographical region

| Baseline characteristic                  | Proportion (%)  | Multivariable (All) |                  | Multivariable (Africa) |                   | Multivariable (Asia) |                   |      |
|------------------------------------------|-----------------|---------------------|------------------|------------------------|-------------------|----------------------|-------------------|------|
|                                          |                 | aOR (95% CI)        | p-value          | aOR (95% CI)           | p-value           | aOR (95% CI)         | p-value           |      |
| <b>Treatment</b>                         |                 |                     |                  |                        |                   |                      |                   |      |
| AL                                       | 733/880 (83%)   | Reference           |                  | Reference              |                   | Reference            |                   |      |
| AS                                       | 56/84 (67%)     | 1.77 (0.85–3.68)    | 0.13             | No data                |                   | 1.91 (0.91-4.00)     | 0.09              |      |
| ASAQ                                     | 544/645 (84%)   | 0.90 (0.63–1.28)    | 0.55             | 0.90 (0.63-1.28)       | 0.57              | No data              |                   |      |
| ASMQ                                     | 560/658 (85%)   | 0.78 (0.54–1.13)    | 0.20             | 0.80 (0.55-1.15)       | 0.23              | No data              |                   |      |
| DP                                       | 559/642 (87%)   | 0.91 (0.62–1.34)    | 0.64             | 0.91 (0.62-1.34)       | 0.64              | No data              |                   |      |
| Q                                        | 53/78 (68%)     | 0.80 (0.38–1.66)    | 0.55             | 0.73 (0.35-1.55)       | 0.42              | No data              |                   |      |
| Interval from malaria to delivery (week) | 2505/2987 (84%) | 0.97 (0.95–0.99)    | 0.002            | 0.98 (0.96-1.00)       | 0.01              | 0.96 (0.91-1.01)     | 0.09              |      |
| Age (year)                               | 2505/2987 (84%) | 0.93 (0.91–0.95)    | <0.001           | 0.91 (0.89-0.94)       | <0.001            | 1.03 (0.97-1.10)     | 0.35              |      |
| <b>Parity</b>                            |                 |                     |                  |                        |                   |                      |                   |      |
| 0                                        | 1199/1292 (93%) | Reference           |                  | Reference              |                   | Reference            |                   |      |
| 1                                        | 498/580 (86%)   | 0.82 (0.58–1.17)    | 0.27             | 0.81 (0.56-1.18)       | 0.27              | 0.94 (0.30-2.94)     | 0.92              |      |
| ≥2                                       | 807/1112 (73%)  | 0.59 (0.41–0.86)    | 0.006            | 0.65 (0.44-0.96)       | 0.03              | 0.43 (0.13-1.43)     | 0.17              |      |
| Weight (kg)                              | 2505/2987 (84%) |                     |                  |                        |                   |                      |                   |      |
| Height (cm)                              | 2383/2806 (85%) |                     |                  |                        |                   |                      |                   |      |
| BMI (kg/m <sup>2</sup> )                 | 2383/2806 (85%) |                     |                  |                        |                   |                      |                   |      |
| HIV infection                            | Yes             | 18/24 (75%)         |                  |                        |                   |                      |                   |      |
|                                          | No              | 2035/2414 (84%)     |                  |                        |                   |                      |                   |      |
| Parasitaemia (log <sub>10</sub> /μL)     | 2505/2987 (84%) | 1.67 (1.42–1.96)    | <0.001           | 1.54 (1.30-1.83)       | <0.001            | 2.39 (1.51-3.77)     | <0.001            |      |
| Body temperature (°C)                    | 2504/2986 (84%) | 1.22 (1.00–1.49)    | 0.045            | 1.13 (0.90-1.42)       | 0.28              | 1.28 (0.84-1.94)     | 0.25              |      |
| Haemoglobin (g/dL)                       | 2500/2978 (84%) | 0.72 (0.65–0.78)    | <0.001           | 0.70 (0.63-0.77)       | <0.001            | 0.81 (0.62-1.05)     | 0.12              |      |
| Gametocytaemia                           | Yes             | 84/91 (92%)         | 3.62 (1.58–8.26) | 0.002                  | 4.31 (1.50-12.36) | 0.01                 | 3.43 (0.77-15.40) | 0.11 |
|                                          | No              | 2417/2891 (84%)     | Reference        |                        | Reference         |                      | Reference         |      |
| Mixed Infection                          | Yes             | 12/16 (75%)         |                  |                        |                   |                      |                   |      |
|                                          | No              | 2493/2971 (84%)     |                  |                        |                   |                      |                   |      |
| <b>Malaria transmission</b>              |                 |                     |                  |                        |                   |                      |                   |      |
| Low                                      | 159/249 (64%)   | 0.81 (0.34–1.91)    | 0.63             | 1.20 (0.55-2.58)       | 0.65              |                      |                   |      |
| Moderate                                 | 1588/1838 (86%) | Reference           |                  | Reference              |                   |                      |                   |      |
| High                                     | 758/900 (84%)   | 1.16 (0.63–2.13)    | 0.64             | 1.17 (0.67-2.06)       | 0.58              |                      |                   |      |

AL: artemether-lumefantrine, aOR: adjusted odds ratio, AS: artesunate monotherapy, ASAQ: artesunate-amodiaquine, ASMQ: artesunate-mefloquine, BMI: body mass index, CI: confidence interval, DP: dihydroartemisinin-piperazine, EGA: estimated gestational age, G: gravidity, HIV: human immunodeficiency virus, OR: odds ratio, Q: quinine monotherapy.
