# Supplementary material
Source: PubMed Central journal article supplement (PMC7265224)

Additional Figure 1. Forest plot of the proportion of miscarriage for each study site

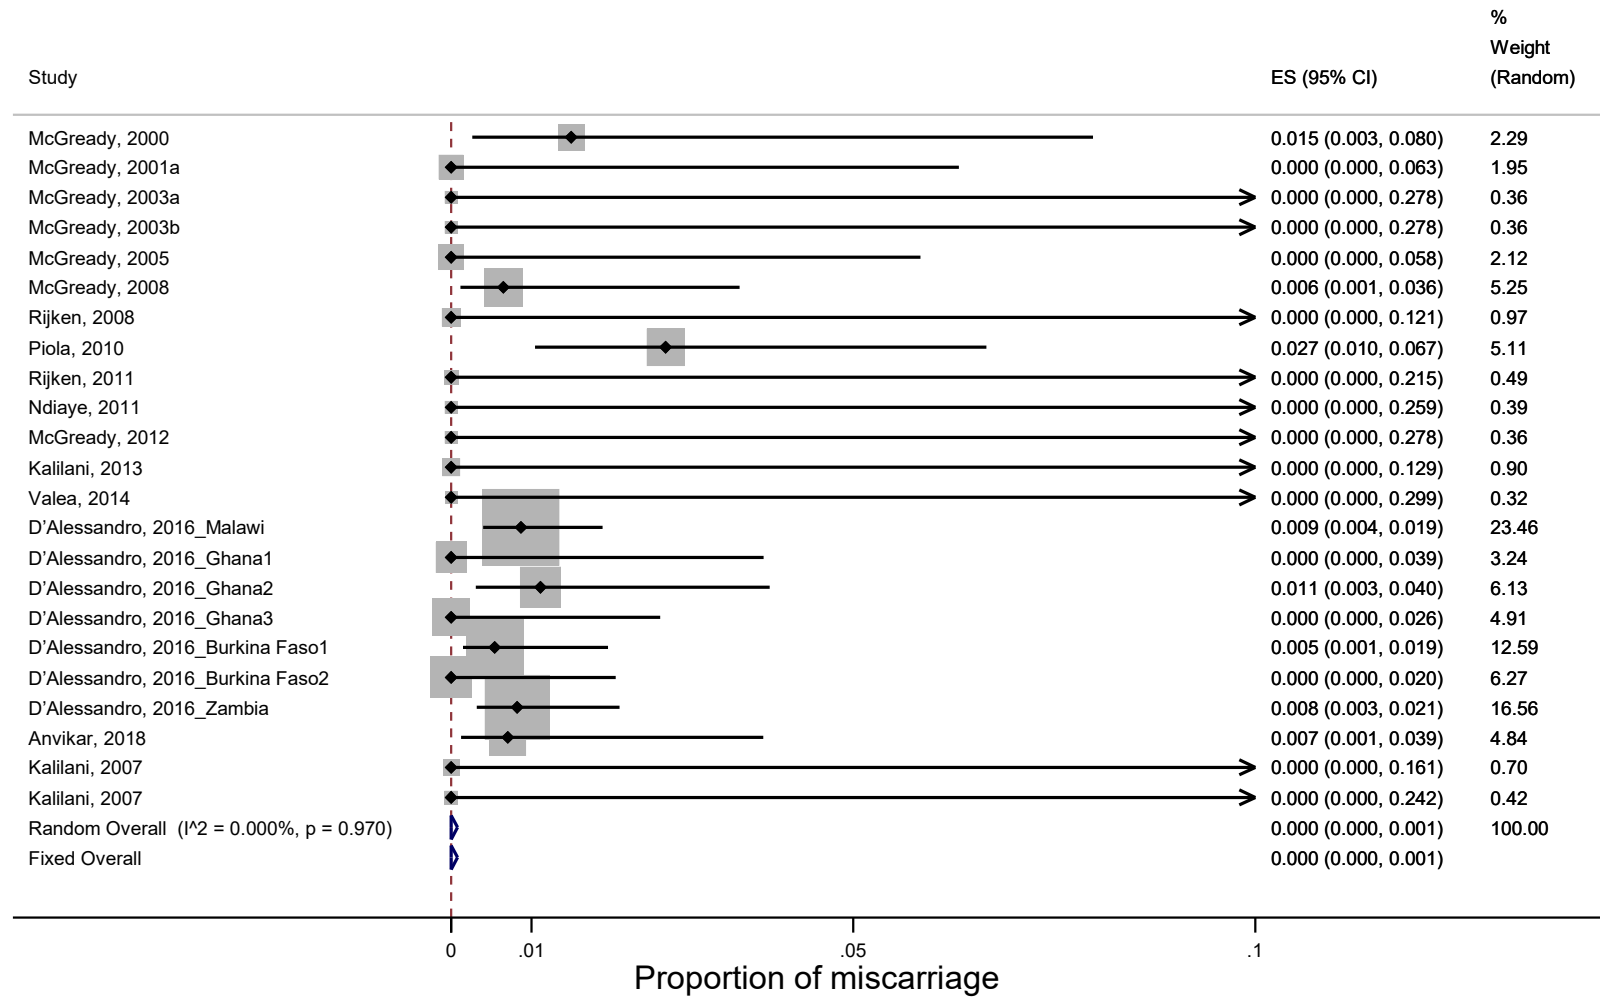

Supplement: 12916_2020_1592_MOESM4_ESM.pdf [file 12916_2020_1592_MOESM4_ESM.pdf]
