# Supplementary material
Source: PubMed Central journal article supplement (PMC7265224)

Additional Figure 3. Forest plot of the proportion of moderate-to-late preterm birth for each study site

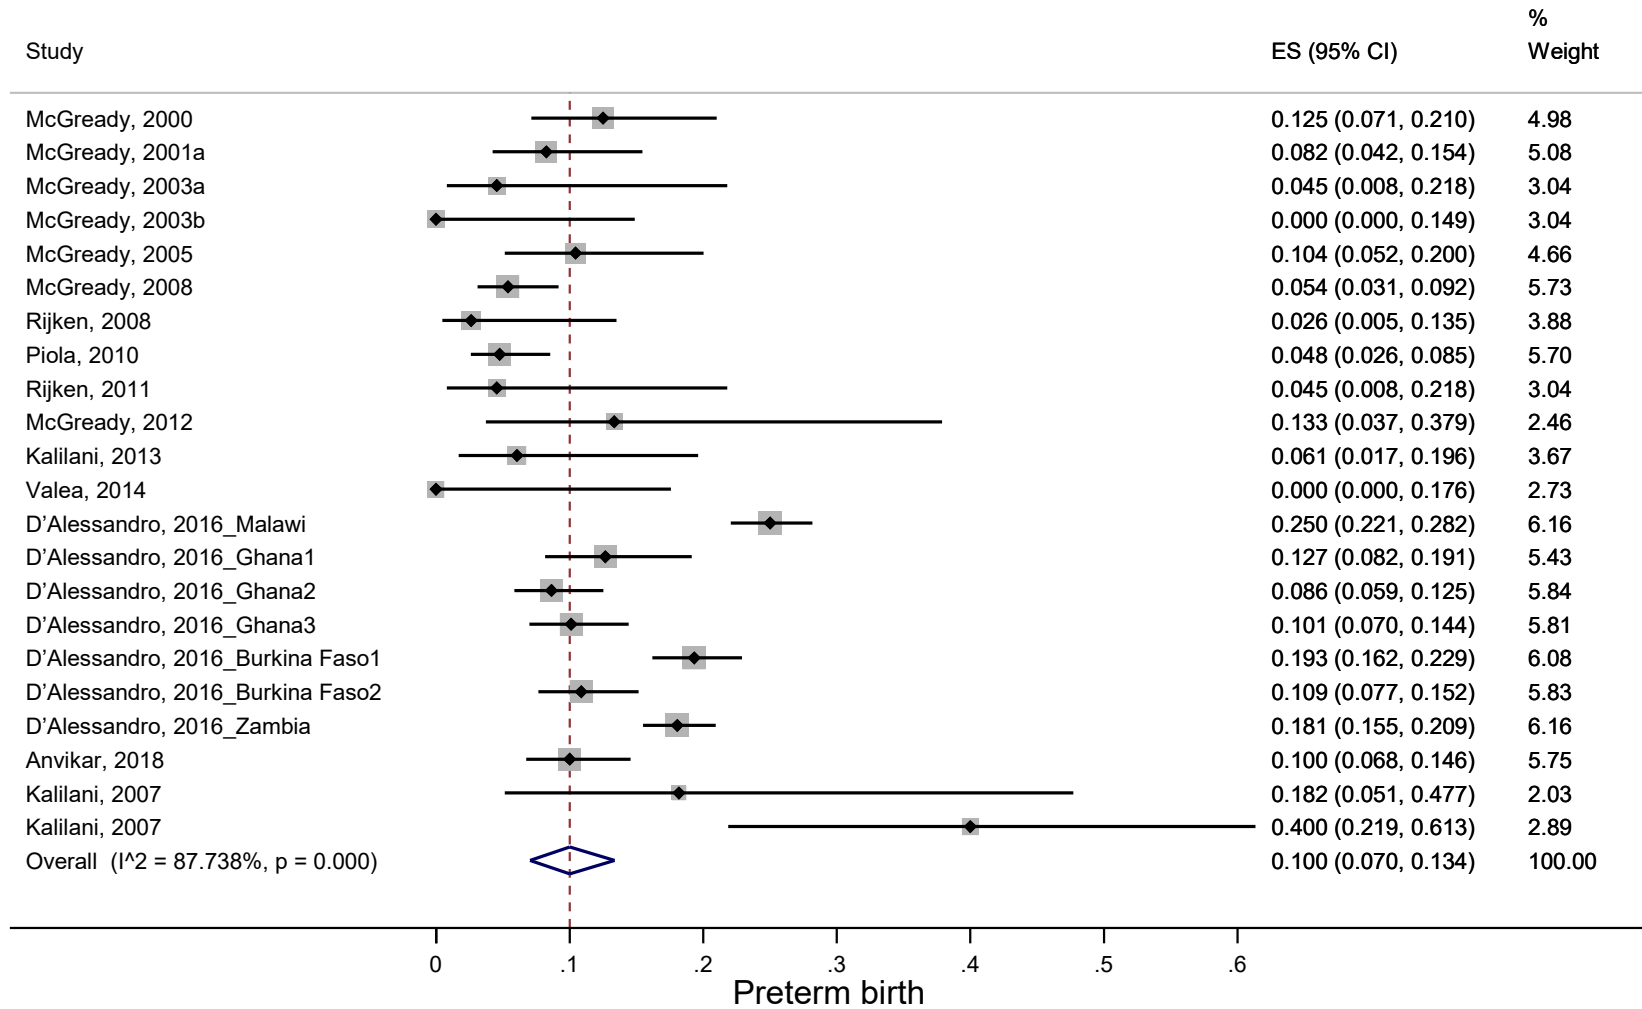

Supplement: 12916_2020_1592_MOESM6_ESM.pdf [file 12916_2020_1592_MOESM6_ESM.pdf]
