# Supplementary material
Source: PubMed Central journal article supplement (PMC7265224)
Supplement: 12916_2020_1592_MOESM8_ESM.pdf [file 12916_2020_1592_MOESM8_ESM.pdf]

Additional Table 1. Summary of the studies included in the pooled analyses

| Study                    | Study design | Lost-to-follow-up | IPTp                                                                                                    | ITN                        | Gestational age estimation | Outcomes included in the analysis |                         |                           |         |                          |
|--------------------------|--------------|-------------------|---------------------------------------------------------------------------------------------------------|----------------------------|----------------------------|-----------------------------------|-------------------------|---------------------------|---------|--------------------------|
|                          |              |                   |                                                                                                         |                            |                            | Congenital abnormality            | Miscarriage /stillbirth | Small-for-gestational age | Preterm | Placental histopathology |
| <b>Shared studies</b>    |              |                   |                                                                                                         |                            |                            |                                   |                         |                           |         |                          |
| McGready, 2000[1]        | RCT          | 13/111            | Not applicable (Asia)                                                                                   | >90% in this study area*   | Fundal height + Dubowitz   | Yes                               | Yes                     | Yes                       | Yes     | Not assessed             |
| McGready, 2001a[2]       | RCT          | 11/130            | Not applicable (Asia)                                                                                   | >90% in this study area*   | Fundal height + Dubowitz   | Yes                               | Yes                     | Yes                       | Yes     | Not assessed             |
| McGready, 2005[3]        | RCT          | 7/81              | Not applicable (Asia)                                                                                   | >90% in this study area*   | Ultrasound                 | Yes                               | Yes                     | Yes                       | Yes     | Yes                      |
| Kalilani, 2007[4]        | RCT          | 9/46              | The second dose of the same drug was administered at least 4 weeks after the first dose instead of IPTp | Given to all at enrolment. | Ballard score              | Yes                               | Yes                     | Yes                       | Yes     | Not assessed             |
| McGready, 2008[5]        | RCT          | 8/246             | Not applicable (Asia)                                                                                   | >90% in this study area*   | Ultrasound                 | Yes                               | Yes                     | Yes                       | Yes     | Not assessed             |
| Piola, 2010[6]           | RCT          | 53/292            | Interrupted until delivery                                                                              | Given to all at enrolment. | Ultrasound                 | Yes                               | Yes                     | Yes                       | Yes     | Yes                      |
| D'Alessandro, 2016[7, 8] | RCT          | 134/3384          | Interrupted for 63 days of follow-up                                                                    | Given to all at enrolment. | Ultrasound (EGA in week)   | Yes                               | Yes                     | Yes                       | Yes     | Yes                      |
| Anvikar, 2018[9]         | RCT          | 6/244             | Not applicable (Asia)                                                                                   | Information not available  | Ultrasound                 | Yes                               | Yes                     | Yes                       | Yes     | Not assessed             |
| McGready, 2003a[10]      | PK study     | 3/27              | Not applicable (Asia)                                                                                   | >90% in this study area*   | Fundal height + Dubowitz   | Yes                               | Yes                     | Yes                       | Yes     | Not assessed             |
| McGready, 2012[11]       | PK study     | 3/19              | Not applicable (Asia)                                                                                   | >90% in this study area*   | Ultrasound                 | Yes                               | Yes                     | Yes                       | Yes     | Not assessed             |
| Rijken, 2011[12]         | PK study     | 3/25              | Not applicable (Asia)                                                                                   | >90% in this study area*   | Ultrasound                 | Yes                               | Yes                     | Yes                       | Yes     | Not assessed             |

Additional Table 1 continued.

| Study                       | Study design         | Lost-to-follow-up | IPTp                      | ITN                          | Gestational age estimation                    | Outcomes included in the analysis |                                       |                                       |                                       |                           |
|-----------------------------|----------------------|-------------------|---------------------------|------------------------------|-----------------------------------------------|-----------------------------------|---------------------------------------|---------------------------------------|---------------------------------------|---------------------------|
|                             |                      |                   |                           |                              |                                               | Congenital abnormality            | Miscarriage /stillbirth               | Small-for-gestational age             | Preterm                               | Placental histopathology  |
| Valea, 2014[13]             | PK study             | 1/21              | IPTp-SP x 2               | Offered to all at enrolment. | LMP or fundal height                          | Yes                               | Yes                                   | Yes                                   | Yes                                   | Not assessed              |
| Ndiaye, 2011[14]            | Single-arm           | 0/26              | Information not available | Information not available    | Fundal height + Dubowitz (No EGA at delivery) | Yes                               | No (EGA at delivery is not available) | No (EGA at delivery is not available) | No (EGA at delivery is not available) | Not assessed              |
| McGready, 2003b[15]         | Observational cohort | 0/24              | Not applicable (Asia)     | >90% in this study area*     | Fundal height + Dubowitz                      | Yes                               | Yes                                   | Yes                                   | Yes                                   | Not assessed              |
| Rijken, 2008[16]            | Observational cohort | 5/48              | Not applicable (Asia)     | >90% in this study area*     | Ultrasound                                    | Yes                               | Yes                                   | Yes                                   | Yes                                   | Not assessed              |
| Kalilani, 2013[17, 18]      | Observational cohort | 6/41              | IPTp-SP x 3               | Given to all at enrolment.   | LMP + fundal height + Ballard score           | Yes                               | Yes                                   | Yes                                   | Yes                                   | Yes                       |
| <b>Studies not included</b> |                      |                   |                           |                              |                                               |                                   |                                       |                                       |                                       |                           |
| Adam, 2004a[19]             | RCT                  | 0/42              | Information not available | Information not available    | Not specified                                 | Not reported                      | Assessed                              | Not assessed                          | Assessed                              | Not assessed              |
| Adam, 2004c[20]             | Single-arm           | 0/28              | Information not available | Information not available    | Ultrasound                                    | Assessed                          | Assessed                              | Not assessed                          | Assessed                              | Not assessed              |
| Adam, 2006[21]              | Single-arm           | 0/32              | Information not available | Information not available    | Ultrasound                                    | Assessed                          | Assessed                              | Not assessed                          | Assessed                              | Not assessed              |
| Adam, 2012[22]              | PK study             | 0/12              | Information not available | Information not available    | Ultrasound                                    | Assessed                          | Assessed                              | Not assessed                          | Assessed                              | Not assessed              |
| Bounyasong, 2001[23]        | RCT                  | 3/57              | Not applicable (Asia)     | Information not available    | Ultrasound                                    | Assessed                          | Not clear                             | IUGR                                  | EGA at delivery                       | Calcification of placenta |
| Mutabingwa, 2009[24]        | RCT                  | 5/83              | Information not available | Information not available    | Dubowitz                                      | Assessed                          | Assessed                              | Not assessed                          | Assessed                              | Not assessed              |

EGA: estimated gestational age, IPTp: intermittent preventive treatment in pregnancy, ITN: insecticide-treated bed nets, IUGR: intrauterine growth restriction, LMP: last menstrual period, PK: pharmacokinetic, RCT: randomized control trial, SP: sulfadoxine-pyrimethamine

\* reported by Boel *et al.* [25]

## Reference for additional files

1. McGready R, Brockman A, Cho T, Cho D, van Vugt M, Luxemburger C, Chongsuphajaisiddhi T, White NJ, Nosten F: Randomized comparison of mefloquine-artesunate versus quinine in the treatment of multidrug-resistant falciparum malaria in pregnancy. *Trans R Soc Trop Med Hyg* 2000, 94(6):689-693.
2. McGready R, Cho T, Samuel, Villegas L, Brockman A, van Vugt M, Looareesuwan S, White NJ, Nosten F: Randomized comparison of quinine-clindamycin versus artesunate in the treatment of falciparum malaria in pregnancy. *Trans R Soc Trop Med Hyg* 2001, 95(6):651-656.
3. McGready R, Ashley EA, Moo E, Cho T, Barends M, Hutagalung R, Looareesuwan S, White NJ, Nosten F: A randomized comparison of artesunate-atovaquone-proguanil versus quinine in treatment for uncomplicated falciparum malaria during pregnancy. *J Infect Dis* 2005, 192(5):846-853.
4. Kalilani L, Mofolo I, Chaponda M, Rogerson SJ, Alker AP, Kwiek JJ, Meshnick SR: A randomized controlled pilot trial of azithromycin or artesunate added to sulfadoxine-pyrimethamine as treatment for malaria in pregnant women. *PLoS One* 2007, 2(11):e1166.
5. McGready R, Tan SO, Ashley EA, Pimanpanarak M, Viladpai-Nguen J, Phaiphun L, Wüstefeld K, Barends M, Laochan N, Keereecharoen L *et al*: A randomised controlled trial of artemether-lumefantrine versus artesunate for uncomplicated Plasmodium falciparum treatment in pregnancy. *PLoS Med* 2008, 5(12):e253.
6. Piola P, Nabasumba C, Turyakira E, Dhorda M, Lindegardh N, Nyehangane D, Snounou G, Ashley Ea, McGready R, Nosten F *et al*: Efficacy and safety of artemether-lumefantrine compared with quinine in pregnant women with uncomplicated Plasmodium falciparum malaria: an open-label, randomised, non-inferiority trial. *Lancet Infect Dis* 2010, 10(11):762-769.
7. PREGACT Study Group, Pekyi D, Ampromfi AA, Tinto H, Traoré-Coulibaly M, Tahita MC, Valéa I, Mwapasa V, Kalilani-Phiri L, Kalanda G *et al*: Four artemisinin-based treatments in African pregnant women with malaria. *N Engl J Med* 2016, 374(10):913-927.
8. Nambozi M, Kabuya J-BB, Hachizovu S, Mwakazanga D, Mulenga J, Kasongo W, Buyze J, Mulenga M, Van Geertruyden J-P, D'Alessandro U: Artemisinin-based combination therapy in pregnant women in Zambia: efficacy, safety and risk of recurrent malaria. *Malar J* 2017, 16:199.
9. Anvikar AR, Kuepfer I, Mishra V, Bruce J, Arya T, Mishra DR, Mohanty S, Mohanty R, Srivastava B, Sharma S *et al*: Efficacy of two artemisinin-based combinations for the treatment of malaria in pregnancy in India: a randomized controlled trial. *Malar J* 2018, 17:246.
10. McGready R, Stepniewska K, Edstein MD, Cho T, Gilveray G, Looareesuwan S, White NJ, Nosten F: The pharmacokinetics of atovaquone and proguanil in pregnant women with acute falciparum malaria. *Eur J Clin Pharmacol* 2003, 59(7):545-552.
11. McGready R, Phyto AP, Rijken MJ, Tarning J, Lindegardh N, Hanpithakpon W, Than HH, Hlaing N, Zin NT, Singhasivanon P *et al*: Artesunate/dihydroartemisinin pharmacokinetics in acute falciparum malaria in pregnancy: absorption, bioavailability, disposition and disease effects. *Br J Clin Pharmacol* 2012, 73(3):467-477.
12. Rijken MJ, McGready R, Phyto AP, Lindegardh N, Tarning J, Laochan N, Than HH, Mu O, Win AK, Singhasivanon P *et al*: Pharmacokinetics of dihydroartemisinin and piperaquine in pregnant and nonpregnant women with uncomplicated falciparum malaria. *Antimicrob Agents Chemother* 2011, 55(12):5500-5506.
13. Valea I, Tinto H, Traore-Coulibaly M, Toe LC, Lindegardh N, Tarning J, Van Geertruyden J-P, D'Alessandro U, Davies GR, Ward SA: Pharmacokinetics of co-formulated mefloquine and artesunate in pregnant and non-pregnant women with uncomplicated Plasmodium falciparum infection in Burkina Faso. *J Antimicrob Chemother* 2014, 69(9):2499-2507.
14. Ndiaye JL, Ndiaye A, Faye B, Ba M, Tine R, Ndiaye D, Gaye A, Gaye O, Brasseur P: Open-label in vivo drug study to evaluate the safety and efficacy of artesunate plus amodiaquine

- combination in pregnant women with uncomplicated *P. falciparum* malaria in Senegal. *Trop Med Int Health* 2011, 16(Supplement 1):140.
15. McGready R, Keo NK, Villegas L, White NJ, Looareesuwan S, Nosten F: Artesunate-atovaquone-proguanil rescue treatment of multidrug-resistant *Plasmodium falciparum* malaria in pregnancy: a preliminary report. *Trans R Soc Trop Med Hyg* 2003, 97(5):592-594.
  16. Rijken MJ, McGready R, Boel ME, Barends M, Proux S, Pimanpanarak M, Singhasivanon P, Nosten F: Dihydroartemisinin-piperaquine rescue treatment of multidrug-resistant *Plasmodium falciparum* malaria in pregnancy: a preliminary report. *Am J Trop Med Hyg* 2008, 78(4):543-545.
  17. Cohee LM, Kalilani-Phiri L, Mawindo P, Joshi S, Adams M, Kenefic L, Jacob CG, Taylor TE, Laufer MK: Parasite dynamics in the peripheral blood and the placenta during pregnancy-associated malaria infection. *Malar J* 2016, 15:483.
  18. Kalilani-Phiri L, Thesing PC, Nyirenda OM, Mawindo P, Madanitsa M, Membe G, Wylie B, Masonbrink A, Makwakwa K, Kamiza S *et al*: Timing of malaria infection during pregnancy has characteristic maternal, infant and placental outcomes. *PLoS One* 2013, 8(9):e74643.
  19. Adam I, Ibrahim MH, A/elbasit IA, Elbashir MI: Low-dose quinine for treatment of chloroquine-resistant *falciparum* malaria in Sudanese pregnant women. *East Mediterr Health J* 2004, 10(4/5):554-559.
  20. Adam I, Elwasila E, Mohammed Ali DA, Elansari E, Elbashir MI: Artemether in the treatment of *falciparum* malaria during pregnancy in eastern Sudan. *Trans R Soc Trop Med Hyg* 2004, 98(9):509-513.
  21. Adam I, Ali DM, Abdalla MA: Artesunate plus sulfadoxine-pyrimethamine in the treatment of uncomplicated *Plasmodium falciparum* malaria during pregnancy in eastern Sudan. *Trans R Soc Trop Med Hyg* 2006, 100(7):632-635.
  22. Adam I, Tarning J, Lindegardh N, Mahgoub H, McGready R, Nosten F: Pharmacokinetics of piperaquine in pregnant women in Sudan with uncomplicated *Plasmodium falciparum* malaria. *Am J Trop Med Hyg* 2012, 87(1):35-40.
  23. Bounyasong S: Randomized trial of artesunate and mefloquine in comparison with quinine sulfate to treat *P. falciparum* malaria pregnant women. *J Med Assoc Thai* 2001, 84(9):1289-1299.
  24. Mutabingwa TK, Muze K, Ord R, Briceño M, Greenwood BM, Drakeley C, Whitty CJM: Randomized trial of artesunate+amodiaquine, sulfadoxine-pyrimethamine+amodiaquine, chlorproguanil-dapsone and SP for malaria in pregnancy in Tanzania. *PLoS One* 2009, 4(4):e5138.
  25. Boel ME, Rijken MJ, Leenstra T, Phyto AP, Pimanpanarak M, Keereecharoen NL, Proux S, Laochan N, Imwong M, Singhasivanon P *et al*: Malaria in the post-partum period; a prospective cohort study. *PLoS One* 2013, 8(3):e57890.
  26. Adam I, Idris HM, Elbashir MI: Quinine for chloroquine-resistant *falciparum* malaria in pregnant Sudanese women in the first trimester. *East Mediterr Health J* 2004, 10(4/5):560-565.
  27. Onyamboko MA, Meshnick SR, Fleckenstein L, Koch MA, Atibu J, Lokomba V, Douoguih M, Hemingway-Foday J, Wesche D, Ryder RW *et al*: Pharmacokinetics and pharmacodynamics of artesunate and dihydroartemisinin following oral treatment in pregnant women with asymptomatic *Plasmodium falciparum* infections in Kinshasa DRC. *Malar J* 2011, 10:49.
  28. Osarfo J, Tagbor H, Cairns M, Alifrangis M, Magnussen P: Dihydroartemisinin-piperaquine versus artesunate-amodiaquine for treatment of malaria infection in pregnancy in Ghana: an open-label, randomised, non-inferiority trial. *Trop Med Int Health* 2017, 22(8):1043-1052.
