# Supplementary material
Source: PubMed Central journal article supplement (PMC7265224)
Supplement: 12916_2020_1592_MOESM9_ESM.pdf [file 12916_2020_1592_MOESM9_ESM.pdf]

Additional Table 2. Baseline characteristics of pregnant women assessed for moderate-to-late preterm birth

| Characteristic                       | All  |             | AL   |             | ASAQ |             | ASMQ |             | DP  |             |
|--------------------------------------|------|-------------|------|-------------|------|-------------|------|-------------|-----|-------------|
|                                      | N    | % (N)       | N    | % (N)       | N    | % (N)       | N    | % (N)       | N   | % (N)       |
|                                      |      | Mean (SD)   |      | Mean (SD)   |      | Mean (SD)   |      | Mean (SD)   |     | Mean (SD)   |
| Age group <20                        | 4131 | 32.0 (1323) | 1035 | 36.2 (375)  | 747  | 31.7 (237)  | 926  | 28.0 (259)  | 804 | 39.8 (320)  |
| 20–24                                |      | 32.2 (1330) |      | 30.7 (318)  |      | 31.6 (236)  |      | 33.4 (309)  |     | 30.1 (242)  |
| 25–29                                |      | 19.4 (803)  |      | 18.3 (189)  |      | 20.1 (150)  |      | 21.5 (199)  |     | 16.7 (134)  |
| 30–34                                |      | 9.7 (401)   |      | 8.3 (86)    |      | 10.8 (81)   |      | 10.7 (99)   |     | 8.3 (67)    |
| >35                                  |      | 6.6 (274)   |      | 6.5 (67)    |      | 5.8 (43)    |      | 6.5 (60)    |     | 5.1 (41)    |
| Gravidity 1                          | 4095 | 35.1 (1439) | 1002 | 34.6 (347)  | 746  | 36.2 (270)  | 926  | 32.8 (304)  | 804 | 38.4 (309)  |
| 2                                    |      | 23.3 (955)  |      | 23.0 (230)  |      | 22.5 (168)  |      | 24.4 (226)  |     | 24.4 (196)  |
| ≥3                                   |      | 41.5 (1701) |      | 42.4 (425)  |      | 41.3 (308)  |      | 42.8 (396)  |     | 37.2 (299)  |
| Parity 0                             | 4126 | 42.4 (1750) | 1031 | 41.9 (432)  | 746  | 40.8 (304)  | 926  | 42.2 (391)  | 804 | 47.6 (383)  |
| 1                                    |      | 21.7 (896)  |      | 20.9 (215)  |      | 22.3 (166)  |      | 21.0 (194)  |     | 22.1 (178)  |
| ≥2                                   |      | 35.9 (1480) |      | 37.2 (384)  |      | 37.0 (276)  |      | 36.8 (341)  |     | 30.2 (243)  |
| Height (cm)                          | 3655 | 155.9 (6.9) | 894  | 156.1 (6.6) | 747  | 158.0 (6.5) | 890  | 156.1 (7.4) | 804 | 155.4 (6.3) |
| Weight (kg)                          | 4130 | 53.9 (8.3)  | 1034 | 53.7 (7.4)  | 747  | 56.3 (8.8)  | 926  | 54.0 (8.4)  | 804 | 54.5 (8.2)  |
| BMI <18.5                            | 3655 | 6.1 (224)   | 894  | 5.7 (51)    | 747  | 5.0 (37)    | 890  | 6.4 (57)    | 804 | 5.5 (44)    |
| 18.5–24.9                            |      | 80.3 (2936) |      | 85.1 (761)  |      | 79.1 (591)  |      | 78.3 (697)  |     | 78.2 (629)  |
| 25.0–29.9                            |      | 11.8 (431)  |      | 8.5 (76)    |      | 12.2 (91)   |      | 13.5 (120)  |     | 14.9 (120)  |
| ≥30 (kg/m <sup>2</sup> )             |      | 1.8 (64)    |      | 0.7 (6)     |      | 3.7 (28)    |      | 1.8 (16)    |     | 1.4 (11)    |
| Fever (temperature >37.5°C)          | 4094 | 9.2 (375)   | 1034 | 8.2 (85)    | 747  | 4.6 (34)    | 925  | 9.7 (90)    | 801 | 4.2 (34)    |
| Haemoglobin on day 0 (g/dL)          | 4107 | 10.0 (1.4)  | 1025 | 10.2 (1.4)  | 747  | 10.0 (1.3)  | 924  | 9.9 (1.4)   | 801 | 10.0 (1.4)  |
| Parasitaemia (log <sub>10</sub> /μL) | 4131 | 3.0 (0.9)   | 1035 | 3.0 (0.8)   | 747  | 2.8 (0.8)   | 926  | 3.0 (0.8)   | 804 | 2.9 (0.8)   |
| Presence of gametocytes              | 4075 | 3.8 (153)   | 1031 | 4.1 (42)    | 747  | 2.9 (22)    | 908  | 1.7 (15)    | 804 | 3.7 (30)    |
| Mixed infection                      | 4131 | 0.7 (29)    | 1035 | 0.9 (9)     | 747  | 0 (0)       | 926  | 0 (0)       | 804 | 0.6 (5)     |
| HIV infection                        | 2618 | 1.2 (31)    | 771  | 1.3 (10)    | 555  | 0.5 (3)     | 550  | 0.2 (1)     | 642 | 0.9 (6)     |
| EGA                                  |      |             |      |             |      |             |      |             |     |             |
| <14.0 weeks                          | 4131 | 0.9 (38)    | 1035 | 0.7 (7)     | 747  | 0.1 (1)     | 926  | 0.4 (4)     | 804 | 1.1 (9)     |
| 14.0–19.9 weeks                      |      | 20.9 (863)  |      | 24.2 (250)  |      | 22.9 (171)  |      | 14.4 (133)  |     | 21.4 (172)  |
| 20.0–23.9 weeks                      |      | 24.8 (1023) |      | 25.9 (268)  |      | 23.3 (174)  |      | 24.7 (229)  |     | 25.6 (206)  |
| 24.0–27.9 weeks                      |      | 22.2 (917)  |      | 20.8 (215)  |      | 27.6 (206)  |      | 23.9 (221)  |     | 19.7 (158)  |
| 28.0–36.9 weeks                      |      | 31.2 (1290) |      | 28.5 (295)  |      | 26.1 (195)  |      | 36.6 (339)  |     | 32.2 (259)  |

AAP: artesunate with atovaquone-proguanil, AL: artemether-lumefantrine, AS: artesunate monotherapy, ASAQ: artesunate-amodiaquine, ASMQ: artesunate-mefloquine, ASSP: artesunate-sulfadoxine-pyrimethamine, BMI: body mass index, DP: dihydroartemisinin-piperaquine, EGA: estimated gestational age, HIV: human immunodeficiency virus, Q: quinine monotherapy, QC: quinine with clindamycin, SD: standard deviation.

Additional Table 2 continued.

| Characteristic                       | AAP |             | AS  |             | ASSP |            | Q   |             | QC |            |
|--------------------------------------|-----|-------------|-----|-------------|------|------------|-----|-------------|----|------------|
|                                      | N   | % (N)       | N   | % (N)       | N    | % (N)      | N   | % (N)       | N  | % (N)      |
|                                      |     | Mean (SD)   |     | Mean (SD)   |      | Mean (SD)  |     | Mean (SD)   |    | Mean (SD)  |
| Age group <20                        | 76  | 28.9 (22)   | 174 | 20.1 (35)   | 147  | 19.0 (28)  | 171 | 21.6 (37)   | 51 | 19.6 (10)  |
| 20–24                                |     | 28.9 (22)   |     | 23.6 (41)   |      | 56.5 (83)  |     | 39.2 (67)   |    | 23.5 (12)  |
| 25–29                                |     | 21.1 (16)   |     | 21.3 (37)   |      | 17.0 (25)  |     | 20.5 (35)   |    | 35.3 (18)  |
| 30–34                                |     | 11.8 (9)    |     | 14.4 (25)   |      | 4.1 (6)    |     | 12.9 (22)   |    | 11.8 (6)   |
| >35                                  |     | 9.2 (7)     |     | 20.7 (36)   |      | 3.4 (5)    |     | 5.8 (10)    |    | 9.8 (5)    |
| Gravidity 1                          | 76  | 31.6 (24)   | 174 | 27.0 (47)   | 147  | 47.6 (70)  | 169 | 32.5 (55)   | 51 | 25.5 (13)  |
| 2                                    |     | 19.7 (15)   |     | 15.5 (27)   |      | 25.2 (37)  |     | 25.4 (43)   |    | 25.5 (13)  |
| ≥3                                   |     | 48.7 (37)   |     | 57.5 (100)  |      | 27.2 (40)  |     | 42.0 (71)   |    | 49.0 (25)  |
| Parity 0                             | 76  | 35.5 (27)   | 174 | 29.9 (52)   | 147  | 55.8 (82)  | 171 | 36.3 (62)   | 51 | 33.3 (17)  |
| 1                                    |     | 23.7 (18)   |     | 19.5 (34)   |      | 23.1 (34)  |     | 25.7 (44)   |    | 25.5 (13)  |
| ≥2                                   |     | 40.8 (31)   |     | 50.6 (88)   |      | 21.1 (31)  |     | 38.0 (65)   |    | 41.2 (21)  |
| Height (cm)                          | 32  | 149.9 (8.2) | 128 | 151.6 (5.7) | 116  | 150.0 (7)  | 44  | 153.3 (5.1) | 0  |            |
| Weight (kg)                          | 76  | 49.7 (6.6)  | 174 | 48.9 (5.9)  | 147  | 47.7 (6.9) | 171 | 55.1 (9.4)  | 51 | 49.4 (5.4) |
| BMI <18.5                            | 32  | 3.1 (1)     | 128 | 7.8 (10)    | 116  | 18.1 (21)  | 44  | 6.8 (3)     | 0  |            |
| 18.5–24.9                            |     | 81.3 (26)   |     | 84.4 (108)  |      | 72.4 (84)  |     | 90.9 (40)   |    |            |
| 25.0–29.9                            |     | 9.4 (3)     |     | 7.0 (9)     |      | 9.5 (11)   |     | 2.3 (1)     |    |            |
| ≥30 (kg/m <sup>2</sup> )             |     | 6.3 (2)     |     | 0.8 (1)     |      | 0 (0)      |     | 0 (0)       |    |            |
| Fever (temperature >37.5°C)          | 76  | 25.0 (19)   | 174 | 27.0 (47)   | 115  | 24.3 (28)  | 171 | 15.8 (27)   | 51 | 21.6 (11)  |
| Haemoglobin on day 0 (g/dL)          | 75  | 9.3 (1.5)   | 174 | 9.5 (1.5)   | 145  | 9.2 (1.4)  | 166 | 10.2 (1.8)  | 50 | 9.2 (1.7)  |
| Parasitaemia (log <sub>10</sub> /μL) | 76  | 3.6 (1)     | 174 | 3.4 (1)     | 147  | 3.4 (0.8)  | 171 | 3.4 (0.9)   | 51 | 3.3 (1.1)  |
| Presence of gametocytes              | 76  | 3.9 (3)     | 171 | 10.5 (18)   | 116  | 3.4 (4)    | 171 | 8.2 (14)    | 51 | 9.8 (5)    |
| Mixed infection                      | 76  | 0 (0)       | 174 | 6.9 (12)    | 147  | 0 (0)      | 171 | 0 (0)       | 51 | 5.9 (3)    |
| HIV infection                        | 0   |             | 0   |             | 23   | 17.4 (4)   | 77  | 9.1 (7)     | 0  |            |
| EGA                                  |     |             |     |             |      |            |     |             |    |            |
| <14.0 weeks                          | 76  | 2.6 (2)     | 174 | 4.6 (8)     | 147  | 2.0 (3)    | 171 | 2.3 (4)     | 51 | 0 (0)      |
| 14.0–19.9 weeks                      |     | 22.4 (17)   |     | 20.1 (35)   |      | 18.4 (27)  |     | 28.1 (48)   |    | 19.6 (10)  |
| 20.0–23.9 weeks                      |     | 19.7 (15)   |     | 18.4 (32)   |      | 25.9 (38)  |     | 30.4 (52)   |    | 17.6 (9)   |
| 24.0–27.9 weeks                      |     | 18.4 (14)   |     | 14.9 (26)   |      | 23.1 (34)  |     | 17.0 (29)   |    | 27.5 (14)  |
| 28.0–36.9 weeks                      |     | 36.8 (28)   |     | 42.0 (73)   |      | 30.6 (45)  |     | 22.2 (38)   |    | 35.3 (18)  |

AAP: artesunate with atovaquone-proguanil, AL: artemether-lumefantrine, AS: artesunate monotherapy, ASAQ: artesunate-amodiaquine, ASMQ: artesunate-mefloquine, ASSP: artesunate-sulfadoxine-pyrimethamine, BMI: body mass index, DP: dihydroartemisinin-piperazine, EGA: estimated gestational age, HIV: human immunodeficiency virus, Q: quinine monotherapy, QC: quinine with clindamycin, SD: standard deviation.
