# Supplementary material
Source: PubMed Central journal article supplement (PMC7265224)
Supplement: 12916_2020_1592_MOESM10_ESM.pdf [file 12916_2020_1592_MOESM10_ESM.pdf]

Additional Table 3. Baseline characteristics of pregnant women assessed for small-for-gestational-age

| Characteristic                       | All  |                    | AL  |                    | ASAQ |                    | ASMQ |                    | DP  |                    |
|--------------------------------------|------|--------------------|-----|--------------------|------|--------------------|------|--------------------|-----|--------------------|
|                                      | N    | % (N)<br>Mean (SD) | N   | % (N)<br>Mean (SD) | N    | % (N)<br>Mean (SD) | N    | % (N)<br>Mean (SD) | N   | % (N)<br>Mean (SD) |
| Age group <20                        | 3707 | 32.4 (1202)        | 973 | 37.5 (365)         | 700  | 31.9 (223)         | 820  | 27.7 (227)         | 716 | 40.6 (291)         |
| 20–24                                |      | 32.0 (1185)        |     | 29.8 (290)         |      | 31.0 (217)         |      | 33.7 (276)         |     | 30.0 (215)         |
| 25–29                                |      | 19.3 (717)         |     | 17.9 (174)         |      | 20.1 (141)         |      | 21.3 (175)         |     | 16.1 (115)         |
| 30–34                                |      | 9.6 (357)          |     | 8.3 (81)           |      | 11.0 (77)          |      | 10.5 (86)          |     | 8.2 (59)           |
| >35                                  |      | 6.6 (246)          |     | 6.5 (63)           |      | 6.0 (42)           |      | 6.8 (56)           |     | 5.0 (36)           |
| Gravidity 1                          | 3671 | 35.8 (1316)        | 940 | 35.5 (334)         | 699  | 36.2 (253)         | 820  | 33.5 (275)         | 716 | 40.1 (287)         |
| 2                                    |      | 22.9 (839)         |     | 23.2 (218)         |      | 22.0 (154)         |      | 23.7 (194)         |     | 23.5 (168)         |
| ≥3                                   |      | 41.3 (1516)        |     | 41.3 (388)         |      | 41.8 (292)         |      | 42.8 (351)         |     | 36.5 (261)         |
| Parity 0                             | 3702 | 43.1 (1596)        | 969 | 43.1 (418)         | 699  | 40.8 (285)         | 820  | 42.6 (349)         | 716 | 49.0 (351)         |
| 1                                    |      | 21.1 (780)         |     | 20.4 (198)         |      | 21.7 (152)         |      | 20.6 (169)         |     | 21.2 (152)         |
| ≥2                                   |      | 35.8 (1326)        |     | 36.4 (353)         |      | 37.5 (262)         |      | 36.8 (302)         |     | 29.7 (213)         |
| Height (cm)                          | 3347 | 156.0 (6.9)        | 855 | 156.1 (6.5)        | 700  | 158.0 (6.6)        | 813  | 156.2 (7.4)        | 716 | 155.4 (6.2)        |
| Weight (kg)                          | 3707 | 54.1 (8.2)         | 973 | 53.7 (7.2)         | 700  | 56.1 (8.7)         | 820  | 54.1 (8.4)         | 716 | 54.7 (8.2)         |
| BMI <18.5                            | 3347 | 6.0 (201)          | 855 | 4.9 (42)           | 700  | 5.1 (36)           | 813  | 7.0 (57)           | 716 | 5.2 (37)           |
| 18.5–24.9                            |      | 80.3 (2687)        |     | 85.5 (731)         |      | 79.4 (556)         |      | 78.4 (637)         |     | 77.8 (557)         |
| 25.0–29.9                            |      | 12.0 (400)         |     | 8.9 (76)           |      | 11.7 (82)          |      | 12.9 (105)         |     | 15.6 (112)         |
| ≥30 (kg/m <sup>2</sup> )             |      | 1.8 (59)           |     | 0.7 (6)            |      | 3.7 (26)           |      | 1.7 (14)           |     | 1.4 (10)           |
| Fever (temperature >37.5°C)          | 3677 | 8.8 (325)          | 973 | 7.8 (76)           | 700  | 5.0 (35)           | 819  | 9.4 (77)           | 715 | 4.3 (31)           |
| Haemoglobin on day 0 (g/dL)          | 3690 | 10.0 (1.4)         | 964 | 10.2 (1.3)         | 700  | 10.0 (1.3)         | 820  | 9.9 (1.3)          | 714 | 10.0 (1.4)         |
| Parasitaemia (log <sub>10</sub> /μL) | 3707 | 3.0 (0.8)          | 973 | 3.0 (0.8)          | 700  | 2.8 (0.8)          | 820  | 3.0 (0.8)          | 716 | 2.9 (0.8)          |
| Presence of gametocytes              | 3655 | 3.6 (133)          | 970 | 4.0 (39)           | 700  | 3.1 (22)           | 801  | 1.2 (10)           | 716 | 3.6 (26)           |
| Mixed infection                      | 3707 | 0.7 (25)           | 973 | 1.0 (10)           | 700  | 0 (0)              | 820  | 0 (0)              | 716 | 0.1 (1)            |
| HIV infection                        | 2437 | 1.0 (24)           | 726 | 1.1 (8)            | 521  | 0.6 (3)            | 514  | 0.2 (1)            | 595 | 1.0 (6)            |
| EGA                                  |      |                    |     |                    |      |                    |      |                    |     |                    |
| <14.0 weeks                          | 3707 | 0.8 (31)           | 973 | 0.7 (7)            | 700  | 0 (0)              | 820  | 0.2 (2)            | 716 | 1.0 (7)            |
| 14.0–19.9 weeks                      |      | 20.6 (765)         |     | 23.6 (230)         |      | 23.3 (163)         |      | 13.0 (107)         |     | 21.2 (152)         |
| 20.0–23.9 weeks                      |      | 24.7 (914)         |     | 25.7 (250)         |      | 23.4 (164)         |      | 25.5 (209)         |     | 25.6 (183)         |
| 24.0–27.9 weeks                      |      | 22.1 (820)         |     | 21.2 (206)         |      | 27.6 (193)         |      | 24.1 (198)         |     | 19.3 (138)         |
| 28.0–36.9 weeks                      |      | 30.7 (1138)        |     | 27.4 (267)         |      | 25.7 (180)         |      | 36.7 (301)         |     | 33.0 (236)         |
| ≥37.0 weeks                          |      | 1.1 (39)           |     | 1.3 (13)           |      | 0 (0)              |      | 0.4 (3)            |     | 0 (0)              |

AAP: artesunate with atovaquone-proguanil, AL: artemether-lumefantrine, AS: artesunate monotherapy, ASAQ: artesunate-amodiaquine, ASMQ: artesunate-mefloquine, ASSP: artesunate-sulfadoxine-pyrimethamine, BMI: body mass index, DP: dihydroartemisinin-piperazine, EGA: estimated gestational age, HIV: human immunodeficiency virus, Q: quinine monotherapy, QC: quinine with clindamycin, SD: standard deviation.

Additional Table 3 continued.

| Characteristic                       | AAP |             | AS  |             | ASSP |             | Q   |             | QC |            |
|--------------------------------------|-----|-------------|-----|-------------|------|-------------|-----|-------------|----|------------|
|                                      | N   | % (N)       | N   | % (N)       | N    | % (N)       | N   | % (N)       | N  | % (N)      |
|                                      |     | Mean (SD)   |     | Mean (SD)   |      | Mean (SD)   |     | Mean (SD)   |    | Mean (SD)  |
| Age group <20                        | 55  | 27.3 (15)   | 154 | 16.2 (25)   | 129  | 20.2 (26)   | 119 | 20.2 (24)   | 41 | 14.6 (6)   |
| 20–24                                |     | 25.5 (14)   |     | 27.9 (43)   |      | 55.8 (72)   |     | 40.3 (48)   |    | 24.4 (10)  |
| 25–29                                |     | 25.5 (14)   |     | 23.4 (36)   |      | 17.8 (23)   |     | 21.0 (25)   |    | 34.1 (14)  |
| 30–34                                |     | 12.7 (7)    |     | 13.6 (21)   |      | 3.9 (5)     |     | 11.8 (14)   |    | 17.1 (7)   |
| >35                                  |     | 9.1 (5)     |     | 18.8 (29)   |      | 2.3 (3)     |     | 6.7 (8)     |    | 9.8 (4)    |
| Gravidity 1                          | 55  | 29.1 (16)   | 154 | 25.3 (39)   | 129  | 50.4 (65)   | 117 | 31.6 (37)   | 41 | 24.4 (10)  |
| 2                                    |     | 20.0 (11)   |     | 15.6 (24)   |      | 24.8 (32)   |     | 23.9 (28)   |    | 24.4 (10)  |
| ≥3                                   |     | 50.9 (28)   |     | 59.1 (91)   |      | 24.8 (32)   |     | 44.4 (52)   |    | 51.2 (21)  |
| Parity 0                             | 55  | 32.7 (18)   | 154 | 27.9 (43)   | 129  | 58.9 (76)   | 119 | 37.0 (44)   | 41 | 29.3 (12)  |
| 1                                    |     | 21.8 (12)   |     | 20.1 (31)   |      | 22.5 (29)   |     | 22.7 (27)   |    | 24.4 (10)  |
| ≥2                                   |     | 45.5 (25)   |     | 51.9 (80)   |      | 18.6 (24)   |     | 40.3 (48)   |    | 46.3 (19)  |
| Height (cm)                          | 23  | 148.0 (8.5) | 107 | 151.7 (5.6) | 102  | 150.0 (7.2) | 31  | 153.4 (5.4) | 0  |            |
| Weight (kg)                          | 55  | 50.9 (7.3)  | 154 | 50.0 (6.6)  | 129  | 47.8 (7.1)  | 119 | 55.6 (9.3)  | 41 | 49.3 (5.5) |
| BMI <18.5                            | 23  | 78.3 (0)    | 107 | 7.5 (8)     | 102  | 18.6 (19)   | 31  | 6.5 (2)     | 0  |            |
| 18.5–24.9                            |     | 13.0 (18)   |     | 83.2 (89)   |      | 70.6 (72)   |     | 87.1 (27)   |    |            |
| 25.0–29.9                            |     | 8.7 (3)     |     | 8.4 (9)     |      | 10.8 (11)   |     | 6.5 (2)     |    |            |
| ≥30 (kg/m <sup>2</sup> )             |     | 0 (2)       |     | 0.9 (1)     |      | 0 (0)       |     | 0 (0)       |    |            |
| Fever (temperature >37.5°C)          | 55  | 25.5 (14)   | 154 | 25.3 (39)   | 101  | 25.7 (26)   | 119 | 15.1 (18)   | 41 | 22.0 (9)   |
| Haemoglobin on day 0 (g/dL)          | 54  | 9.2 (1.4)   | 154 | 9.5 (1.5)   | 127  | 9.2 (1.3)   | 116 | 10.4 (1.7)  | 41 | 9.3 (1.7)  |
| Parasitaemia (log <sub>10</sub> /μL) | 55  | 3.6 (1.1)   | 154 | 3.3 (1.1)   | 129  | 3.4 (0.8)   | 119 | 3.4 (0.8)   | 41 | 3.3 (1.1)  |
| Presence of gametocytes              | 55  | 5.5 (3)     | 151 | 11.3 (17)   | 102  | 2.9 (3)     | 119 | 8.4 (10)    | 41 | 7.3 (3)    |
| Mixed infection                      | 55  | 1.8 (1)     | 154 | 7.1 (11)    | 129  | 0 (0)       | 119 | 0 (0)       | 41 | 4.9 (2)    |
| HIV infection                        | 0   |             | 0   |             | 21   | 14.3 (3)    | 60  | 5.0 (3)     | 0  |            |
| EGA                                  |     |             |     |             |      |             |     |             |    |            |
| <14.0 weeks                          | 55  | 3.6 (2)     | 154 | 4.5 (7)     | 129  | 1.6 (2)     | 119 | 3.4 (4)     | 41 | 0 (0)      |
| 14.0–19.9 weeks                      |     | 21.8 (12)   |     | 22.1 (34)   |      | 19.4 (25)   |     | 29.4 (35)   |    | 17.1 (7)   |
| 20.0–23.9 weeks                      |     | 18.2 (10)   |     | 16.2 (25)   |      | 26.4 (34)   |     | 28.6 (34)   |    | 12.2 (5)   |
| 24.0–27.9 weeks                      |     | 18.2 (10)   |     | 10.4 (16)   |      | 20.9 (27)   |     | 18.5 (22)   |    | 24.4 (10)  |
| 28.0–36.9 weeks                      |     | 30.9 (17)   |     | 38.3 (59)   |      | 31.8 (41)   |     | 18.5 (22)   |    | 36.6 (15)  |
| ≥37.0 weeks                          |     | 7.3 (4)     |     | 8.4 (13)    |      | 0 (0)       |     | 1.7 (2)     |    | 9.8 (4)    |

AAP: artesunate with atovaquone-proguanil, AL: artemether-lumefantrine, AS: artesunate monotherapy, ASAQ: artesunate-amodiaquine, ASMQ: artesunate-mefloquine, ASSP: artesunate-sulfadoxine-pyrimethamine, BMI: body mass index, DP: dihydroartemisinin-piperaquine, EGA: estimated gestational age, HIV: human immunodeficiency virus, Q: quinine monotherapy, QC: quinine with clindamycin, SD: standard deviation.
