# Supplementary material
Source: PubMed Central journal article supplement (PMC7265224)
Supplement: 12916_2020_1592_MOESM11_ESM.pdf [file 12916_2020_1592_MOESM11_ESM.pdf]

Additional Table 4. Baseline characteristics of pregnant women assessed for deposition of malaria pigment in the placenta

| Characteristic                           | All  |                    | AL  |                    | AS |                    | ASAQ |                    | ASMQ |                    | DP  |                    | Q  |                    |
|------------------------------------------|------|--------------------|-----|--------------------|----|--------------------|------|--------------------|------|--------------------|-----|--------------------|----|--------------------|
|                                          | N    | % (N)<br>Mean (SD) | N   | % (N)<br>Mean (SD) | N  | % (N)<br>Mean (SD) | N    | % (N)<br>Mean (SD) | N    | % (N)<br>Mean (SD) | N   | % (N)<br>Mean (SD) | N  | % (N)<br>Mean (SD) |
| Interval from malaria to delivery (week) | 3033 | 14.1 (6.1)         | 893 | 14.3 (6.2)         | 85 | 13.8 (8.0)         | 649  | 14.7 (5.8)         | 668  | 13.5 (5.7)         | 658 | 14.0 (6.2)         | 80 | 14.6 (6.7)         |
| Age group <20                            | 3033 | 34.7 (1051)        | 893 | 37.6 (336)         | 85 | 15.3 (13)          | 649  | 31.1 (202)         | 668  | 31.9 (213)         | 658 | 40.4 (266)         | 80 | 26.3 (21)          |
| 20–24                                    |      | 30.3 (920)         |     | 29.1 (260)         |    | 22.4 (19)          |      | 31.7 (206)         |      | 30.1 (201)         |     | 30.4 (200)         |    | 42.5 (34)          |
| 25–29                                    |      | 18.7 (567)         |     | 18.4 (164)         |    | 18.8 (16)          |      | 20.0 (130)         |      | 19.3 (129)         |     | 16.7 (110)         |    | 22.5 (18)          |
| 30–34                                    |      | 9.8 (296)          |     | 9.0 (80)           |    | 18.8 (16)          |      | 10.6 (69)          |      | 11.1 (74)          |     | 8.1 (53)           |    | 5.0 (4)            |
| >35                                      |      | 6.6 (199)          |     | 5.9 (53)           |    | 24.7 (21)          |      | 6.5 (42)           |      | 7.6 (51)           |     | 4.4 (29)           |    | 3.8 (3)            |
| Parity 0                                 | 3030 | 43.3 (1311)        | 891 | 43.5 (388)         | 85 | 24.7 (21)          | 648  | 40.9 (265)         | 668  | 42.1 (281)         | 658 | 49.1 (323)         | 80 | 41.3 (33)          |
| 1                                        |      | 19.6 (595)         |     | 19.0 (169)         |    | 17.6 (15)          |      | 20.5 (133)         |      | 17.7 (118)         |     | 21.1 (139)         |    | 26.3 (21)          |
| ≥2                                       |      | 37.1 (1124)        |     | 37.5 (334)         |    | 57.6 (49)          |      | 38.6 (250)         |      | 40.3 (269)         |     | 29.8 (196)         |    | 32.5 (26)          |
| Height (cm)                              | 2845 | 156.6 (6.7)        | 785 | 156.2 (6.6)        | 85 | 151.6 (5.7)        | 649  | 158.0 (6.6)        | 668  | 157.2 (7.2)        | 658 | 155.7 (6.2)        | 0  |                    |
| BMI (kg/m <sup>2</sup> )                 | 2845 | 22.3 (3.0)         | 785 | 21.7 (2.4)         | 85 | 21.6 (2.5)         | 649  | 22.5 (3.3)         | 668  | 22.5 (3.2)         | 658 | 22.7 (2.9)         | 0  |                    |
| Body temperature (°C)                    | 3032 | 36.7 (0.6)         | 893 | 36.7 (0.6)         | 85 | 37.0 (1.1)         | 649  | 36.7 (0.6)         | 667  | 36.7 (0.5)         | 658 | 36.5 (0.5)         | 80 | 37.1 (0.6)         |
| Haemoglobin on day 0 (g/dL)              | 3024 | 10.1 (1.4)         | 885 | 10.2 (1.4)         | 85 | 9.6 (1.5)          | 649  | 10.1 (1.3)         | 668  | 10.1 (1.3)         | 658 | 10.1 (1.3)         | 79 | 10.5 (1.6)         |
| Parasitaemia (log <sub>10</sub> /μL)     | 3033 | 3.0 (0.8)          | 893 | 3.1 (0.8)          | 85 | 3.5 (1.0)          | 649  | 2.8 (0.8)          | 668  | 2.9 (0.8)          | 658 | 2.9 (0.8)          | 80 | 3.3 (0.9)          |
| Presence of gametocytes                  | 3028 | 3.0 (91)           | 890 | 3.1 (28)           | 83 | 8.4 (7)            | 649  | 3.2 (21)           | 668  | 0.9 (6)            | 658 | 3.0 (20)           | 80 | 11.3 (9)           |
| Mixed infection                          | 3033 | 0.5 (16)           | 893 | 0.8 (7)            | 85 | 10.6 (9)           | 649  | 0.0 (0)            | 668  | 0.0 (0)            | 658 | 0.0 (0)            | 80 | 0.0 (0)            |
| HIV infection                            | 2315 | 1.1 (25)           | 700 | 1.4 (10)           | 0  |                    | 479  | 0.6 (3)            | 497  | 0.0 (0)            | 577 | 1.2 (7)            | 62 | 8.1 (5)            |
| Treatment outcome                        |      |                    |     |                    |    |                    |      |                    |      |                    |     |                    |    |                    |
| No recurrence                            | 2987 | 74.6 (2227)        | 880 | 60.1 (529)         | 84 | 82.1 (69)          | 645  | 81.2 (524)         | 658  | 72.3 (476)         | 642 | 87.7 (563)         | 78 | 84.6 (66)          |
| Recrudescence                            |      | 3.3 (98)           |     | 5.6 (49)           |    | 8.3 (7)            |      | 1.7 (11)           |      | 3.6 (24)           |     | 0.9 (6)            |    | 1.3 (1)            |
| Reinfection                              |      | 20.0 (596)         |     | 32.2 (283)         |    | 8.3 (7)            |      | 15.2 (98)          |      | 21.6 (142)         |     | 9.7 (62)           |    | 5.1 (4)            |
| No PCR                                   |      | 2.2 (66)           |     | 2.2 (19)           |    | 1.2 (1)            |      | 1.9 (12)           |      | 2.4 (16)           |     | 1.7 (11)           |    | 9.0 (7)            |
| MAP category                             |      |                    |     |                    |    |                    |      |                    |      |                    |     |                    |    |                    |
| Low                                      | 3033 | 8.3 (252)          | 893 | 13.5 (121)         | 85 | 100.0 (85)         | 649  | 0.0 (0)            | 668  | 0.0 (0)            | 658 | 0.0 (0)            | 80 | 57.5 (46)          |
| Moderate                                 |      | 61.9 (1877)        |     | 58.0 (518)         |    | 0.0 (0)            |      | 54.1 (351)         |      | 54.5 (364)         |     | 92.7 (610)         |    | 42.5 (34)          |
| High                                     |      | 29.8 (904)         |     | 28.4 (254)         |    | 0.0 (0)            |      | 45.9 (298)         |      | 45.5 (304)         |     | 7.3 (48)           |    | 0.0 (0)            |

AL: artemether-lumefantrine, AS: artesunate monotherapy, ASAQ: artesunate-amodiaquine, ASMQ: artesunate-mefloquine, BMI: body mass index, DP: dihydroartemisinin-piperazine, HIV: human immunodeficiency virus, Q: quinine monotherapy, SD: standard deviation.
