# Supplementary material
Source: PubMed Central journal article supplement (PMC7265224)
Supplement: 12916_2020_1592_MOESM12_ESM.pdf [file 12916_2020_1592_MOESM12_ESM.pdf]

Additional Table 5. Multivariable logistic regression on the risk of deposition of malaria pigment in the placenta by parity in different malaria transmission area

|                       | aOR (95% CI)*    | p-value |
|-----------------------|------------------|---------|
| Low transmission      |                  |         |
| Parity 0              | Reference        |         |
| 1                     | 1.22 (0.53–2.82) | 0.64    |
| ≥2                    | 1.26 (0.62–2.59) | 0.53    |
| Moderate transmission |                  |         |
| Parity 0              | Reference        |         |
| 1                     | 0.71 (0.46–1.11) | 0.13    |
| ≥2                    | 0.52 (0.34–0.80) | 0.003   |
| High transmission     |                  |         |
| Parity 0              | Reference        |         |
| 1                     | 0.84 (0.39–1.79) | 0.65    |
| ≥2                    | 0.50 (0.26–0.98) | 0.04    |

CI: confidence interval, aOR: adjusted odds ratio.

\* Adjusted for treatment outcome, interval from malaria to delivery, age, body temperature, haemoglobin on day 0, parasitaemia and presence of gametocyte. p-value for interaction: 0.20.
